# Supplementary material for: Comparing Bacterial Community Composition of Healthy and Dark Spot-Affected Siderastrea siderea in Florida and the Caribbean
Source: PLoS One. 2014 Oct 7;9(10):e108767. doi: 10.1371/journal.pone.0108767 (PMC4188562; doi:10.1371/journal.pone.0108767)
Supplement: Table S1 — List of bacterial genera detected in Siderastrea siderea samples based on 4,978 operational taxonomic units (OTUs) detected by the PhyloChip G3 microarray. OTUs that were unclassified at the genus level are not shown. (XLSX) [file pone.0108767.s005.xlsx]

## Sheet: Siderastrea_SingletonsRemoved
Genus	Class	DRTOSSD07	DRTOSSD08	DRTOSSD10	DRTOSSH01	DRTOSSH03	DRTOSSH04	DRTOSSH06	VIISSSD06	VIISSSD07	VIISSSD08	VIISSSD09	VIISSSD10	VIISSSH01	VIISSSH02	VIISSSH03	VIISSSH04	VIISSSH05
Acidimicrobium ferrooxidans	Actinobacteria	0	1	0	1	1	1	1	0	0	0	0	0	0	0	0	0	0
Actinomadura madurae	Actinobacteria	0	0	0	0	1	0	0	1	0	0	0	0	0	0	0	0	0
Actinomyces	Actinobacteria	0	1	0	0	0	0	0	0	0	0	0	0	1	0	0	0	0
Actinopolymorpha	Actinobacteria	0	1	1	1	2	2	2	0	0	0	0	0	2	2	0	0	0
Adlercreutzia	Actinobacteria	0	4	1	0	3	1	2	0	0	0	0	0	4	0	0	0	0
Agromyces	Actinobacteria	0	1	0	0	2	0	2	0	0	0	0	1	3	0	0	0	0
Arthrobacter	Actinobacteria	5	9	4	8	5	5	7	5	7	6	1	5	12	2	5	2	3
Bifidobacterium pseudolongum	Actinobacteria	0	0	0	0	0	0	0	0	0	0	0	0	1	1	0	0	0
Bifidobacterium	Actinobacteria	0	1	0	0	1	1	0	0	0	0	0	0	1	0	1	0	0
Brevibacterium luteolum	Actinobacteria	0	0	0	0	0	1	0	1	1	0	1	1	0	1	1	1	0
Cellulomonas	Actinobacteria	0	0	0	1	0	0	0	0	0	0	0	1	1	0	0	0	0
Collinsella stercoris	Actinobacteria	0	2	0	0	0	1	0	0	0	1	0	0	3	0	1	0	0
Collinsella	Actinobacteria	1	7	3	3	3	3	3	0	1	3	2	1	6	1	4	1	0
Corynebacterium freneyi	Actinobacteria	1	1	0	1	0	1	1	1	1	1	1	1	1	1	1	1	1
Corynebacterium pseudogenitalium	Actinobacteria	0	1	1	0	0	0	1	1	0	0	0	0	0	0	0	0	1
Corynebacterium	Actinobacteria	47	142	96	87	85	130	77	102	119	111	116	94	170	101	123	85	90
Cryobacterium	Actinobacteria	0	0	0	0	0	0	0	0	1	1	0	0	0	0	0	0	0
Cryocola	Actinobacteria	0	0	0	1	0	1	0	0	1	0	0	0	0	1	0	0	0
Dactylosporangium	Actinobacteria	0	0	0	1	1	1	0	0	0	0	0	0	1	1	0	0	0
Frankia	Actinobacteria	0	1	1	0	1	1	2	0	0	1	0	0	2	1	0	0	0
Gordonia	Actinobacteria	1	1	1	1	1	1	1	1	1	2	1	1	1	2	2	0	2
Iamia	Actinobacteria	0	0	0	0	1	0	1	0	0	0	0	0	1	1	0	0	0
Kineococcus	Actinobacteria	0	0	0	1	0	1	0	0	0	0	0	0	0	0	0	0	0
Knoellia subterranea	Actinobacteria	0	1	0	0	1	0	1	0	0	0	0	0	2	0	0	0	0
Kocuria marina	Actinobacteria	0	0	0	3	3	2	2	0	0	0	0	0	6	0	1	0	0
Kocuria palustris	Actinobacteria	0	0	0	0	1	0	0	1	0	0	0	0	0	0	0	0	0
Kocuria rhizophila	Actinobacteria	0	0	0	1	1	0	0	0	0	0	0	0	0	0	0	0	0
Kocuria	Actinobacteria	0	0	1	4	3	2	1	0	0	0	0	0	5	0	1	0	0
Lentzea albidocapillata	Actinobacteria	0	0	1	0	1	1	0	0	0	0	0	0	1	1	0	0	1
Microbacterium kitamiense	Actinobacteria	0	1	0	0	0	0	0	0	0	1	0	0	1	0	0	0	0
Microbacterium lacticum	Actinobacteria	0	1	0	0	1	1	1	0	0	1	0	0	1	0	1	0	0
Microbacterium	Actinobacteria	3	2	4	4	1	2	1	3	2	2	3	4	4	3	1	1	2
Microbispora rosea	Actinobacteria	0	1	0	1	0	1	0	1	0	0	0	1	1	0	1	0	0
Micrococcus luteus	Actinobacteria	8	0	0	16	9	0	1	16	0	3	0	13	14	0	0	0	0
Micrococcus	Actinobacteria	2	1	1	6	3	2	1	5	0	4	0	5	4	0	0	0	1
Micromonospora carbonacea	Actinobacteria	0	0	0	0	0	0	0	0	0	0	0	0	1	1	0	0	0
Micromonospora lupini	Actinobacteria	0	0	0	0	0	0	0	1	0	0	0	0	0	0	1	0	1
Mobiluncus	Actinobacteria	0	0	0	0	0	0	0	0	0	0	0	0	1	1	0	0	0
Mycobacterium abscessus	Actinobacteria	0	0	0	1	0	1	1	0	0	0	0	0	1	0	0	0	0
Mycobacterium kyorinense	Actinobacteria	0	0	0	1	0	1	1	0	0	0	0	0	1	0	0	0	0
Mycobacterium leprae	Actinobacteria	0	0	0	1	1	1	1	0	0	0	0	0	1	0	0	0	0
Mycobacterium llatzerense	Actinobacteria	0	1	0	0	0	0	0	0	0	0	0	0	1	0	0	0	0
Mycobacterium xenopi	Actinobacteria	1	1	1	1	1	1	1	0	1	0	0	0	1	1	0	0	0
Mycobacterium	Actinobacteria	0	2	0	4	0	5	6	0	1	1	0	0	8	2	1	0	0
Nocardia kruczakiae	Actinobacteria	0	0	0	1	0	0	0	0	1	0	1	0	1	1	0	0	0
Nocardia	Actinobacteria	1	1	1	1	1	1	1	0	1	0	0	1	1	1	0	0	1
Nocardiopsis	Actinobacteria	0	0	0	0	0	0	0	0	0	1	0	0	1	0	0	0	0
Nonomuraea	Actinobacteria	0	5	1	2	2	4	5	0	1	0	0	0	5	1	2	0	1
Olsenella uli	Actinobacteria	0	0	0	0	0	1	0	0	0	0	0	0	1	0	0	0	0
Propionibacterium acnes	Actinobacteria	6	8	5	9	7	5	4	4	4	4	2	4	11	5	9	4	4
Propionibacterium	Actinobacteria	5	11	6	12	11	10	6	7	5	3	2	6	14	7	5	3	3
Propionicimonas	Actinobacteria	0	1	0	0	0	0	0	0	0	0	1	0	1	0	0	0	1
Pseudoclavibacter	Actinobacteria	0	0	0	0	1	0	0	0	0	1	0	0	0	0	0	0	0
Pseudonocardia	Actinobacteria	0	0	0	0	0	0	0	0	1	0	0	0	1	0	0	0	0
Rhodococcus equi	Actinobacteria	0	0	0	1	0	1	0	0	0	0	0	0	0	1	0	0	0
Rhodococcus	Actinobacteria	0	2	0	2	0	1	0	0	0	1	0	0	2	0	0	0	1
Rothia mucilaginosa	Actinobacteria	0	0	0	1	0	0	0	1	0	1	0	1	1	0	0	0	0
Rubrobacter	Actinobacteria	0	0	0	0	1	0	2	0	1	0	0	0	2	0	0	0	0
Saccharomonospora	Actinobacteria	0	1	1	0	1	1	0	0	1	0	0	1	1	1	1	1	0
Salinispora arenicola	Actinobacteria	0	0	0	0	0	0	0	0	0	0	0	0	1	0	0	0	1
Salinispora	Actinobacteria	0	0	0	0	0	0	0	0	0	1	0	1	0	0	0	0	0
Sinomonas	Actinobacteria	0	0	0	0	0	0	1	0	0	0	0	0	1	0	0	0	0
Slackia exigua	Actinobacteria	0	1	0	0	0	0	0	0	0	0	0	0	1	0	0	0	0
Slackia	Actinobacteria	0	1	1	0	1	0	0	0	0	0	0	0	0	0	0	0	0
Streptomyces acidiscabies	Actinobacteria	0	0	0	0	0	0	0	0	1	0	0	0	1	0	0	0	0
Streptomyces avellaneus	Actinobacteria	0	2	0	0	0	2	1	0	0	1	0	0	2	0	0	0	0
Streptomyces flavotricini	Actinobacteria	0	0	0	0	0	0	0	1	1	0	1	1	0	1	1	1	0
Streptomyces glaucescens	Actinobacteria	0	0	0	0	0	0	0	0	0	0	1	0	0	0	1	0	0
Streptomyces	Actinobacteria	2	5	1	7	5	3	2	3	5	2	2	4	9	3	3	2	3
Streptosporangium	Actinobacteria	0	0	0	1	1	1	1	0	0	1	0	0	1	1	1	0	0
Virgisporangium ochraceum	Actinobacteria	0	1	1	1	1	1	1	0	1	1	0	0	1	0	1	0	1
Zhihengliuella	Actinobacteria	0	0	0	1	0	0	0	1	0	0	0	1	1	0	0	0	0
Afipia	Alphaproteobacteria	1	2	1	1	1	1	1	0	0	1	0	0	2	1	1	0	0
Agrobacterium larrymoorei	Alphaproteobacteria	0	1	0	1	0	0	0	0	0	0	0	0	1	0	0	0	0
Rhizobium sp. IRBG 74	Alphaproteobacteria	2	2	4	6	1	4	5	0	0	3	0	0	4	0	1	0	0
Rhizobium undicola	Alphaproteobacteria	1	1	1	1	1	1	0	1	0	0	0	0	0	1	0	0	0
Agrobacterium	Alphaproteobacteria	1	0	0	4	0	3	1	0	0	1	0	0	4	1	1	0	0
Ahrensia	Alphaproteobacteria	0	0	2	1	0	4	2	0	0	0	0	0	4	0	0	0	0
Amaricoccus	Alphaproteobacteria	1	2	2	1	2	2	2	1	1	1	1	1	2	1	1	0	0
Anaplasma	Alphaproteobacteria	0	2	1	1	0	2	2	0	0	2	0	0	3	0	1	0	0
Aurantimonas altamirensis	Alphaproteobacteria	0	0	1	1	1	1	0	0	0	1	0	0	1	0	0	0	0
Aurantimonas manganoxydans	Alphaproteobacteria	0	0	0	0	0	0	2	0	0	0	0	0	2	0	0	0	0
Aurantimonas	Alphaproteobacteria	0	0	0	1	0	0	1	0	0	0	0	0	1	0	0	0	0
Azospirillum brasilense	Alphaproteobacteria	0	0	0	0	0	1	0	0	0	0	0	0	1	0	0	0	0
Azospirillum sp. B510	Alphaproteobacteria	0	1	1	1	0	0	0	0	0	0	0	0	0	1	1	0	0
Azospirillum	Alphaproteobacteria	0	2	7	4	0	8	3	0	0	0	1	0	9	3	1	0	0
Balneimonas	Alphaproteobacteria	0	0	0	1	0	1	0	0	0	0	0	0	1	0	0	0	0
Bartonella bacilliformis	Alphaproteobacteria	0	0	0	0	0	1	0	0	0	0	0	0	1	0	0	0	0
Bartonella elizabethae	Alphaproteobacteria	1	0	1	1	0	2	0	0	1	1	0	1	0	1	0	1	0
Bartonella grahamii	Alphaproteobacteria	0	1	0	0	0	0	0	0	0	0	0	0	1	0	0	0	0
Bartonella queenslandensis	Alphaproteobacteria	1	0	0	0	0	2	0	0	0	0	0	0	2	0	0	0	0
Candidatus Bartonella rudakovii	Alphaproteobacteria	0	0	0	1	0	1	1	0	0	0	0	0	1	0	0	0	0
Bartonella	Alphaproteobacteria	4	7	6	6	3	6	1	3	0	4	1	0	9	2	0	0	0
Beijerinckia indica	Alphaproteobacteria	0	0	0	1	0	0	0	0	0	0	0	0	1	0	0	0	0
Beijerinckia	Alphaproteobacteria	0	0	0	1	1	1	1	0	0	0	0	0	1	0	0	0	0
Bosea	Alphaproteobacteria	1	0	0	0	0	0	0	1	1	0	1	0	0	0	1	0	0
Bradyrhizobium canariense	Alphaproteobacteria	0	0	0	0	0	1	1	0	0	0	0	0	0	0	0	0	0
Bradyrhizobium elkanii	Alphaproteobacteria	1	2	1	1	1	2	1	1	1	1	1	1	2	1	1	0	1
Bradyrhizobium yuanmingense	Alphaproteobacteria	1	0	2	1	0	2	1	1	0	0	0	1	3	1	1	0	1
Bradyrhizobium	Alphaproteobacteria	0	0	0	2	0	1	0	0	0	0	0	0	3	0	0	0	0
Brevundimonas alba	Alphaproteobacteria	0	0	0	0	0	0	0	0	0	0	1	0	1	0	0	0	0
Brevundimonas diminuta	Alphaproteobacteria	0	3	2	4	1	2	2	0	1	1	1	0	6	0	0	0	0
Brevundimonas	Alphaproteobacteria	0	1	1	0	0	2	2	0	0	1	0	0	3	1	0	0	0
Brucella	Alphaproteobacteria	0	1	1	1	0	0	0	0	0	0	0	0	2	0	1	0	0
Candidatus Liberibacter africanus	Alphaproteobacteria	0	1	1	1	1	1	1	0	0	1	0	0	1	0	0	0	0
Candidatus Odyssella	Alphaproteobacteria	0	3	3	1	2	3	2	2	0	3	1	2	4	1	0	0	1
Candidatus Pelagibacter ubique	Alphaproteobacteria	0	5	5	4	4	6	2	1	1	1	2	1	5	1	3	1	1
Candidatus Pelagibacter	Alphaproteobacteria	4	8	1	2	3	8	8	2	4	2	1	4	20	5	2	0	4
Caulobacter	Alphaproteobacteria	0	0	0	0	1	0	0	0	0	0	1	0	1	0	0	0	0
Chelativorans multitrophicus	Alphaproteobacteria	0	0	0	0	0	0	1	0	0	0	0	0	1	0	0	0	0
Chelativorans	Alphaproteobacteria	0	1	0	2	0	0	0	0	0	0	0	0	2	0	0	0	0
Cohaesibacter	Alphaproteobacteria	0	4	0	0	0	2	0	3	0	1	4	0	4	1	0	0	0
Candidatus Devosia euplotis	Alphaproteobacteria	0	0	0	0	0	0	1	0	0	0	0	0	1	0	0	0	0
Devosia	Alphaproteobacteria	1	4	4	4	4	5	4	0	0	1	1	2	9	4	3	0	0
Dinoroseobacter	Alphaproteobacteria	0	1	0	0	1	0	0	1	0	0	0	0	1	0	0	0	0
Ehrlichia canis	Alphaproteobacteria	0	1	0	0	0	0	0	0	0	0	0	0	1	0	0	0	0
Ehrlichia muris	Alphaproteobacteria	0	0	0	0	0	0	0	0	0	1	0	0	0	1	1	0	0
Sinorhizobium kostiense	Alphaproteobacteria	1	1	1	0	1	0	0	0	0	1	0	0	1	1	0	0	0
Sinorhizobium saheli	Alphaproteobacteria	0	0	1	0	0	2	1	0	0	0	0	0	2	0	1	0	0
Sinorhizobium terangae	Alphaproteobacteria	0	0	0	0	0	1	0	0	0	0	0	0	1	1	0	0	0
Sinorhizobium xinjiangense	Alphaproteobacteria	0	1	3	3	2	3	3	0	0	0	0	0	3	2	0	0	0
Ensifer	Alphaproteobacteria	0	2	12	4	6	12	10	0	0	2	0	2	14	10	3	0	0
Erythrobacter	Alphaproteobacteria	0	1	1	1	1	1	3	0	2	1	0	0	1	0	1	0	0
Gluconacetobacter	Alphaproteobacteria	0	0	0	0	1	1	1	0	1	0	0	0	1	1	0	0	0
Gluconobacter	Alphaproteobacteria	0	1	1	1	0	1	0	0	1	1	0	0	1	0	1	0	1
Hyphomicrobium	Alphaproteobacteria	0	1	1	1	1	1	1	1	0	1	0	0	3	0	0	0	0
Hyphomonas jannaschiana	Alphaproteobacteria	0	1	0	0	1	0	0	1	0	0	0	0	1	0	0	0	0
Hyphomonas	Alphaproteobacteria	0	1	0	0	1	1	1	0	0	1	0	0	1	0	0	0	0
Inquilinus	Alphaproteobacteria	1	2	6	4	3	6	4	0	0	0	0	1	5	3	0	0	0
Kaistobacter	Alphaproteobacteria	0	1	1	3	0	1	0	0	0	0	0	0	2	0	0	0	0
Labrenzia aggregata	Alphaproteobacteria	0	1	0	0	1	0	0	1	0	0	1	1	1	0	0	0	0
Labrenzia	Alphaproteobacteria	0	1	0	1	1	0	1	1	0	0	1	0	1	0	1	0	0
Labrys	Alphaproteobacteria	0	0	0	0	0	0	1	0	0	0	0	0	1	0	0	0	0
Leisingera	Alphaproteobacteria	0	0	0	0	0	0	0	1	0	0	1	1	1	0	0	0	0
Loktanella	Alphaproteobacteria	0	2	0	0	0	0	0	2	0	0	1	1	0	0	0	0	0
Magnetococcus	Alphaproteobacteria	0	0	0	0	0	0	1	0	0	0	0	0	1	0	0	0	0
Magnetospirillum	Alphaproteobacteria	0	2	2	1	0	2	0	0	0	2	0	1	2	2	2	0	0
Maribius	Alphaproteobacteria	0	0	0	0	0	0	0	0	1	0	0	0	1	0	0	0	0
Maricaulis virginensis	Alphaproteobacteria	0	1	0	1	0	1	1	0	0	0	0	0	1	0	0	0	0
Maricaulis	Alphaproteobacteria	0	1	0	1	0	0	0	0	0	0	0	0	2	0	0	0	0
Marinovum algicola	Alphaproteobacteria	0	1	0	0	0	0	0	0	0	0	0	0	1	0	0	0	0
Marinovum	Alphaproteobacteria	0	1	0	0	0	0	0	0	0	0	0	0	1	0	0	0	0
Marivita	Alphaproteobacteria	0	0	1	0	0	0	0	0	0	0	0	0	1	0	0	0	0
Mesorhizobium alhagi	Alphaproteobacteria	1	0	0	1	0	1	0	1	0	1	0	1	1	0	1	0	0
Mesorhizobium temperatum	Alphaproteobacteria	0	0	0	0	2	0	0	1	0	0	0	0	0	0	2	0	0
Mesorhizobium	Alphaproteobacteria	0	1	2	4	1	5	0	1	0	0	0	0	6	2	2	0	0
Methylobacterium radiotolerans	Alphaproteobacteria	0	1	0	1	0	0	0	0	0	0	0	0	0	1	1	0	0
Methylobacterium	Alphaproteobacteria	1	4	3	5	4	5	2	2	3	3	4	2	5	1	2	2	2
Methylocystis parvus	Alphaproteobacteria	0	1	0	0	1	0	0	1	0	0	0	0	1	0	0	0	0
Methylopila	Alphaproteobacteria	0	1	1	1	0	1	0	0	0	0	0	0	1	0	0	0	0
Methylosinus sporium	Alphaproteobacteria	0	0	1	2	1	2	1	0	0	1	0	0	2	0	0	0	0
Nautella italica	Alphaproteobacteria	0	1	0	0	0	0	0	1	0	0	1	0	1	0	0	0	0
Nautella	Alphaproteobacteria	0	5	0	0	2	0	0	4	0	0	2	1	5	0	0	0	0
Nisaea	Alphaproteobacteria	0	1	1	1	0	0	0	0	0	0	0	0	1	1	1	0	0
Nitratireductor aquibiodomus	Alphaproteobacteria	2	6	2	3	4	3	2	1	0	4	1	0	8	2	0	0	0
Nitratireductor	Alphaproteobacteria	3	3	3	3	3	4	3	4	0	3	1	1	5	4	1	0	0
Nordella	Alphaproteobacteria	0	1	2	1	0	2	1	1	0	0	2	1	3	2	0	0	0
Novispirillum	Alphaproteobacteria	0	0	0	0	0	1	0	0	0	0	0	0	1	0	0	0	0
Novosphingobium	Alphaproteobacteria	1	13	11	11	9	12	11	2	9	3	1	2	16	5	1	0	1
Oceanibulbus indolifex	Alphaproteobacteria	0	0	0	0	0	0	3	0	0	0	0	0	3	0	0	0	0
Oceanicaulis alexandrii	Alphaproteobacteria	0	1	0	0	0	0	0	0	0	0	0	0	1	0	0	0	0
Oceanicaulis	Alphaproteobacteria	0	1	0	0	1	2	2	0	0	0	0	0	2	0	0	0	0
Ochrobactrum intermedium	Alphaproteobacteria	0	0	0	1	0	0	0	0	0	0	0	0	1	0	0	0	0
Ochrobactrum	Alphaproteobacteria	0	1	2	2	2	3	3	0	0	1	0	0	5	0	0	0	1
Paracoccus alcaliphilus	Alphaproteobacteria	0	0	0	0	0	0	0	1	0	0	0	0	1	0	0	0	0
Paracoccus aminovorans	Alphaproteobacteria	0	1	0	0	1	0	1	0	0	0	0	0	1	0	0	0	0
Paracoccus marcusii	Alphaproteobacteria	0	0	0	0	0	0	0	1	1	0	0	0	0	0	0	0	0
Paracoccus versutus	Alphaproteobacteria	0	1	0	0	0	0	0	0	0	0	1	0	1	0	0	0	0
Paracoccus zeaxanthinifaciens	Alphaproteobacteria	0	1	0	0	1	0	0	0	1	0	0	0	1	0	0	0	0
Paracoccus	Alphaproteobacteria	1	15	2	2	6	2	3	9	8	1	3	7	13	5	1	0	0
Parvibaculum	Alphaproteobacteria	1	2	1	2	2	2	1	2	0	1	1	1	2	2	1	0	0
Parvularcula	Alphaproteobacteria	0	1	1	2	0	0	0	0	1	0	0	0	3	1	0	0	0
Pedomicrobium australicum	Alphaproteobacteria	0	1	0	1	0	1	1	0	0	0	0	0	1	1	0	0	0
Pedomicrobium	Alphaproteobacteria	0	1	0	2	1	1	0	0	0	0	0	0	1	1	0	0	0
Pelagibaca	Alphaproteobacteria	0	1	0	0	0	0	0	0	0	0	0	0	1	0	0	0	0
Phaeobacter gallaeciensis	Alphaproteobacteria	0	3	0	0	1	0	0	1	0	0	2	1	3	0	0	0	0
Phaeobacter	Alphaproteobacteria	0	5	0	0	1	0	0	4	0	0	3	0	6	0	0	0	0
Phyllobacterium myrsinacearum	Alphaproteobacteria	0	1	1	1	1	1	0	1	0	1	1	0	0	1	0	0	0
Phyllobacterium	Alphaproteobacteria	1	3	2	3	1	3	2	1	0	2	1	0	4	1	0	0	0
Pseudaminobacter salicylatoxidans	Alphaproteobacteria	0	0	0	1	0	0	0	0	0	0	0	0	1	0	0	0	0
Pseudaminobacter	Alphaproteobacteria	0	1	1	1	1	1	1	1	0	1	1	1	1	1	1	0	0
Pseudochrobactrum	Alphaproteobacteria	0	1	2	0	0	2	2	0	0	0	0	0	3	0	0	0	0
Pseudovibrio	Alphaproteobacteria	0	2	1	2	2	1	2	1	1	0	2	0	2	1	1	0	0
Rhizobium etli	Alphaproteobacteria	1	1	1	1	1	1	1	1	1	1	1	1	1	1	1	0	0
Rhizobium leguminosarum	Alphaproteobacteria	1	1	3	5	1	4	3	0	0	1	0	0	5	0	1	0	0
Rhizobium multihospitium	Alphaproteobacteria	2	0	2	0	1	0	0	1	0	2	0	0	0	1	0	0	0
Rhizobium sullae	Alphaproteobacteria	0	0	0	0	0	0	1	0	0	0	0	0	1	0	0	0	0
Rhizobium	Alphaproteobacteria	36	41	48	48	35	53	42	13	0	36	5	0	54	15	3	2	5
Rhodobaca	Alphaproteobacteria	1	1	1	1	1	1	1	1	1	1	1	1	1	1	0	0	0
Rhodobacter sphaeroides	Alphaproteobacteria	0	1	0	0	0	0	0	1	0	0	0	0	1	0	0	0	0
Rhodobacter	Alphaproteobacteria	1	2	2	1	3	2	1	2	0	2	2	2	2	2	2	1	2
Rhodocista pekingensis	Alphaproteobacteria	0	1	0	0	1	0	0	0	0	0	0	0	1	1	1	0	0
Rhodocista	Alphaproteobacteria	0	1	0	0	0	0	0	1	0	0	0	0	1	0	0	0	0
Rhodoplanes elegans	Alphaproteobacteria	0	1	1	0	1	1	0	0	0	1	0	0	1	0	0	0	0
Rhodoplanes	Alphaproteobacteria	1	2	4	0	2	6	2	1	0	2	1	0	6	3	0	0	2
Rhodopseudomonas	Alphaproteobacteria	1	1	1	1	1	1	0	0	0	0	0	1	1	2	1	0	1
Rhodospirillum centenum	Alphaproteobacteria	0	1	0	0	1	1	1	1	0	1	0	0	0	1	1	0	0
Rhodovibrio	Alphaproteobacteria	0	0	1	1	0	1	0	0	0	0	0	0	1	1	1	0	0
Rhodovulum sulfidophilum	Alphaproteobacteria	0	2	0	0	1	0	0	1	0	0	0	0	2	0	0	0	0
Rhodovulum	Alphaproteobacteria	0	1	0	1	0	0	0	0	0	0	0	0	1	0	0	0	0
Rickettsia akari	Alphaproteobacteria	0	1	0	1	0	0	2	0	0	0	0	0	2	0	0	0	0
Rickettsia australis	Alphaproteobacteria	0	1	0	0	0	0	1	0	0	0	0	0	1	0	0	0	0
Rickettsia typhi	Alphaproteobacteria	0	0	0	0	0	0	1	0	0	0	0	0	1	0	0	0	0
Rickettsia	Alphaproteobacteria	0	1	0	0	0	0	7	0	0	0	0	0	7	0	0	0	0
Roseivivax	Alphaproteobacteria	0	0	0	0	1	0	0	1	1	0	0	0	1	1	0	0	0
Roseobacter	Alphaproteobacteria	0	1	0	0	1	0	0	0	0	0	0	0	1	1	0	0	0
Roseomonas	Alphaproteobacteria	0	1	1	1	1	1	1	0	1	0	0	0	2	1	1	0	0
Rubellimicrobium	Alphaproteobacteria	0	3	0	1	1	0	3	0	1	1	0	0	4	0	0	0	0
Ruegeria atlantica	Alphaproteobacteria	0	1	0	0	0	0	0	1	0	0	1	1	1	0	0	0	0
Ruegeria lacuscaerulensis	Alphaproteobacteria	0	1	0	0	1	0	0	0	0	0	1	0	1	0	0	0	0
Ruegeria	Alphaproteobacteria	3	21	1	1	7	1	1	14	2	1	18	13	21	5	1	0	3
Shimia	Alphaproteobacteria	0	2	0	0	1	0	0	1	0	0	1	0	1	0	0	0	0
Shinella	Alphaproteobacteria	1	0	1	2	1	2	2	1	1	1	0	1	3	2	1	0	0
Sinorhizobium arboris	Alphaproteobacteria	0	0	1	0	1	1	0	0	0	1	0	0	1	0	0	0	0
Sinorhizobium	Alphaproteobacteria	5	4	13	11	4	17	12	0	0	5	0	0	18	3	0	0	0
Sphingobium herbicidovorans	Alphaproteobacteria	1	1	1	1	1	1	1	1	0	1	1	1	1	1	1	0	0
Sphingobium	Alphaproteobacteria	0	5	3	3	1	4	0	0	0	2	1	1	3	2	3	1	0
Sphingomonas melonis	Alphaproteobacteria	0	0	1	0	1	0	0	0	1	1	1	1	0	1	1	0	0
Sphingomonas wittichii	Alphaproteobacteria	0	1	1	1	0	1	0	0	0	0	0	0	1	0	0	0	0
Sphingomonas yabuuchiae	Alphaproteobacteria	0	0	0	0	0	1	1	0	0	0	0	0	1	0	0	0	0
Sphingomonas	Alphaproteobacteria	0	2	0	2	2	2	1	0	1	1	0	0	4	0	0	0	0
Sphingopyxis macrogoltabida	Alphaproteobacteria	0	1	0	0	1	0	1	0	0	0	0	0	0	0	0	0	0
Sphingopyxis	Alphaproteobacteria	0	2	0	0	1	0	2	1	0	0	1	1	2	0	0	0	0
Sulfitobacter delicatus	Alphaproteobacteria	0	0	0	0	0	0	0	0	1	0	0	0	1	0	0	0	0
Sulfitobacter pontiacus	Alphaproteobacteria	0	2	0	0	0	0	1	0	0	0	0	0	2	0	0	0	0
Sulfitobacter sp. EE-36	Alphaproteobacteria	0	2	0	0	0	0	0	0	0	0	0	0	2	0	0	0	0
Sulfitobacter	Alphaproteobacteria	0	4	0	0	1	0	0	1	1	0	0	1	4	0	0	0	0
Thalassobacter stenotrophicus	Alphaproteobacteria	0	1	0	0	0	0	0	0	0	0	0	0	1	0	0	0	0
Thalassobacter	Alphaproteobacteria	0	1	0	0	0	0	0	0	0	0	0	0	1	0	0	0	0
Thalassobius gelatinovorus	Alphaproteobacteria	0	1	0	0	0	0	0	1	0	0	1	0	0	0	0	0	0
Thalassobius	Alphaproteobacteria	0	1	0	0	1	0	0	1	0	0	1	1	1	0	0	0	0
Thalassospira	Alphaproteobacteria	0	0	0	0	0	0	1	0	0	0	0	0	1	0	0	0	0
Thioclava	Alphaproteobacteria	0	2	1	0	1	1	0	0	0	0	0	0	2	0	0	0	0
Wolbachia	Alphaproteobacteria	0	2	0	1	1	3	2	0	0	1	0	0	3	0	0	0	0
Xanthobacter	Alphaproteobacteria	0	0	1	0	0	1	0	0	0	0	0	0	1	0	0	0	0
Desulfurobacterium	Aquificae	0	1	0	1	1	0	0	0	0	0	0	0	1	1	0	0	0
Hydrogenobaculum	Aquificae	0	1	0	0	1	1	1	0	0	1	0	0	1	0	0	0	0
Alicyclobacillus	Bacilli	0	3	0	0	1	0	1	0	1	0	0	0	2	1	0	0	0
Alkalibacillus	Bacilli	0	1	0	0	0	0	0	0	0	0	0	0	1	0	0	0	0
Alkalibacterium kapii	Bacilli	0	1	0	0	0	0	1	0	0	0	0	0	1	0	0	0	0
Alkalibacterium putridalgicola	Bacilli	0	1	0	0	0	0	0	0	0	0	0	0	1	0	0	0	0
Anoxybacillus kestanbolensis	Bacilli	0	2	0	0	0	0	2	0	1	0	0	0	2	0	0	0	0
Bacillus amyloliquefaciens	Bacilli	1	1	2	3	3	2	1	2	2	1	1	2	3	2	2	2	3
Bacillus anthracis	Bacilli	1	0	1	24	1	0	0	6	1	1	0	25	1	1	0	0	5
Bacillus badius	Bacilli	0	0	0	0	0	0	0	0	1	1	0	0	0	0	1	0	1
Bacillus cytotoxicus	Bacilli	0	0	0	1	0	0	0	0	0	0	0	0	1	0	0	0	0
Bacillus endophyticus	Bacilli	0	0	0	0	0	0	0	0	0	0	0	1	0	0	0	0	1
Bacillus flexus	Bacilli	0	0	0	0	0	2	1	1	1	1	0	0	1	0	1	0	1
Bacillus halodurans	Bacilli	0	0	0	1	1	0	1	0	0	1	0	0	1	0	0	0	1
Bacillus hwajinpoensis	Bacilli	0	0	0	0	0	0	0	0	0	0	0	0	1	1	0	0	0
Bacillus malacitensis	Bacilli	0	0	0	1	0	0	0	0	1	0	1	1	0	1	1	1	0
Bacillus pseudofirmus	Bacilli	0	0	0	0	0	0	1	0	0	0	0	0	1	0	0	1	1
Bacillus sp. SG-1	Bacilli	0	0	0	0	0	1	0	0	1	0	0	0	1	0	0	0	0
Bacillus weihenstephanensis	Bacilli	0	0	0	3	0	0	0	0	0	0	0	3	1	0	0	0	2
Bacillus	Bacilli	14	26	17	137	35	16	24	36	47	27	7	118	66	23	21	9	54
Brevibacillus	Bacilli	0	1	0	0	0	0	0	0	0	1	0	0	0	0	0	0	0
Brochothrix thermosphacta	Bacilli	0	2	0	1	2	2	0	1	1	0	1	0	2	1	2	1	1
Carnobacterium divergens	Bacilli	0	0	0	1	0	0	0	0	0	0	0	0	1	0	0	1	1
Carnobacterium maltaromaticum	Bacilli	0	1	0	0	0	0	0	0	0	0	0	0	1	0	0	0	0
Enterococcus casseliflavus	Bacilli	0	2	1	2	1	2	0	1	1	1	0	1	2	1	2	1	2
Enterococcus faecalis	Bacilli	1	1	1	2	0	1	1	1	2	1	1	2	1	1	1	1	1
Enterococcus gallinarum	Bacilli	0	0	0	1	0	0	0	1	1	0	0	1	0	0	1	0	1
Enterococcus lactis	Bacilli	0	0	0	2	0	0	2	0	0	0	0	0	1	1	0	0	0
Enterococcus	Bacilli	1	2	2	8	3	3	7	1	2	0	0	1	5	3	2	1	1
Exiguobacterium	Bacilli	0	2	0	0	0	0	0	0	2	0	0	0	1	0	0	0	0
Gemella	Bacilli	0	0	0	1	0	0	0	0	0	0	0	0	1	1	0	0	0
Geobacillus debilis	Bacilli	0	0	0	0	0	0	0	0	0	0	0	1	0	0	1	0	1
Geobacillus	Bacilli	0	5	0	3	1	3	4	0	3	3	1	0	6	0	2	0	2
Halobacillus	Bacilli	0	1	0	2	0	0	1	0	1	0	0	0	1	0	0	0	1
Jeotgalicoccus	Bacilli	0	1	0	0	1	1	2	1	0	0	0	0	2	0	0	0	0
Lactobacillus crispatus	Bacilli	0	1	0	0	0	1	1	0	0	1	1	1	1	0	2	0	0
Lactobacillus helveticus	Bacilli	0	0	0	0	0	0	0	0	1	1	0	0	0	0	1	1	0
Lactobacillus kefiri	Bacilli	0	0	0	0	0	0	0	0	0	1	0	0	0	1	1	0	0
Lactobacillus paralimentarius	Bacilli	0	1	0	0	0	0	0	0	0	0	0	0	1	0	0	0	0
Lactobacillus sanfranciscensis	Bacilli	0	0	0	0	0	0	1	0	0	0	0	0	1	0	0	0	0
Lactobacillus	Bacilli	1	8	1	3	3	3	5	1	2	6	0	0	9	2	8	1	1
Lactococcus garvieae	Bacilli	1	0	0	0	0	0	0	0	0	2	0	0	1	0	0	0	1
Leuconostoc citreum	Bacilli	0	0	0	0	0	1	0	0	0	0	0	0	0	0	1	0	0
Leuconostoc	Bacilli	1	3	3	1	1	3	1	1	1	2	1	0	1	1	1	0	1
Listeria grayi	Bacilli	0	1	0	0	1	0	0	0	0	0	0	0	0	0	0	0	0
Listeria monocytogenes	Bacilli	0	0	0	1	0	0	0	0	0	0	0	0	1	0	0	0	0
Lysinibacillus	Bacilli	0	0	0	0	0	0	0	0	1	0	0	0	1	0	0	0	0
Oceanobacillus	Bacilli	0	0	0	1	1	0	0	0	1	1	0	0	0	0	1	0	1
Oenococcus oeni	Bacilli	0	1	0	0	0	1	0	0	0	1	0	0	1	0	0	0	0
Paenibacillus lactis	Bacilli	0	0	0	0	0	0	0	0	0	0	0	0	1	1	1	0	2
Paenibacillus macquariensis	Bacilli	0	0	0	0	0	0	1	0	0	0	0	0	1	0	0	0	0
Paenibacillus	Bacilli	0	6	1	2	0	4	0	0	2	0	0	3	5	0	0	7	8
Pediococcus pentosaceus	Bacilli	0	1	0	0	0	0	0	1	0	1	0	1	0	0	0	0	0
Planococcus maitriensis	Bacilli	0	1	1	1	2	1	1	1	1	1	1	1	2	1	1	1	1
Pontibacillus	Bacilli	0	1	0	1	1	1	0	0	0	0	0	0	0	0	1	1	0
Salimicrobium	Bacilli	0	1	0	0	0	0	0	0	0	0	0	0	1	0	0	0	0
Salinicoccus	Bacilli	0	0	0	0	0	0	0	0	1	0	0	0	0	0	1	1	0
Solibacillus silvestris	Bacilli	0	0	0	0	0	0	0	0	1	0	0	0	1	0	0	0	0
Solibacillus	Bacilli	1	2	0	3	1	0	0	1	3	1	0	0	1	0	2	0	2
Staphylococcus epidermidis	Bacilli	4	17	5	16	55	11	11	11	9	14	4	7	27	5	57	11	5
Streptococcus	Bacilli	4	12	7	12	28	11	11	12	16	9	3	7	18	11	34	12	9
Streptococcus mutans	Bacilli	0	0	1	1	0	3	0	1	1	0	1	1	3	1	1	1	1
Streptococcus oralis	Bacilli	0	1	0	1	0	0	0	0	0	0	0	0	1	1	1	1	0
Streptococcus pseudopneumoniae	Bacilli	0	3	1	3	0	2	2	0	0	2	0	0	3	0	4	0	0
Streptococcus salivarius	Bacilli	0	0	1	1	1	3	0	1	1	1	0	2	1	1	4	0	0
Streptococcus sanguinis	Bacilli	0	1	1	1	1	1	0	0	1	1	0	0	1	0	1	0	1
Streptococcus sobrinus	Bacilli	0	0	0	0	0	1	0	0	0	0	1	0	0	0	0	0	0
Streptococcus thermophilus	Bacilli	0	0	0	0	1	2	0	1	0	1	0	2	0	0	2	0	0
Streptococcus	Bacilli	1	15	4	20	5	8	11	8	5	9	11	5	19	12	14	5	2
Thermicanus	Bacilli	0	1	0	0	0	0	1	0	0	0	0	0	1	0	0	0	0
Trichococcus	Bacilli	0	0	0	1	0	0	0	0	0	0	0	0	1	0	0	1	0
Alistipes	Bacteroidia	0	3	2	2	2	4	3	1	1	1	1	1	4	2	2	2	0
Bacteroides fragilis	Bacteroidia	0	0	0	0	0	0	0	0	0	1	0	0	1	0	0	0	0
Bacteroides plebeius	Bacteroidia	0	0	0	0	0	0	0	0	0	0	0	0	1	0	0	0	1
Prevotella copri	Bacteroidia	0	1	0	0	0	0	0	0	0	0	0	0	1	0	0	0	0
Prevotella pallens	Bacteroidia	0	0	0	0	0	0	1	0	0	0	0	0	1	0	0	0	0
Prevotella	Bacteroidia	0	8	4	4	4	5	5	1	2	3	3	5	14	6	5	2	0
Achromobacter	Betaproteobacteria	1	0	1	2	2	1	2	0	0	1	0	0	3	0	1	0	0
Acidovorax delafieldii	Betaproteobacteria	0	1	0	1	1	1	0	0	1	0	1	0	0	1	1	0	1
Aquabacterium	Betaproteobacteria	19	49	45	41	20	57	22	23	33	30	25	26	60	33	32	20	34
Burkholderia fungorum	Betaproteobacteria	0	0	0	1	1	0	1	1	2	1	1	0	2	0	1	0	2
Burkholderia sordidicola	Betaproteobacteria	0	0	0	0	0	0	0	1	0	0	0	0	1	1	1	0	1
Burkholderia	Betaproteobacteria	0	0	1	1	1	1	1	1	0	0	0	0	2	1	0	0	0
Candidatus Tremblaya princeps	Betaproteobacteria	0	0	0	0	0	1	0	0	0	0	0	0	1	0	0	0	0
Comamonas	Betaproteobacteria	0	0	0	2	0	2	0	0	1	1	0	1	3	1	0	0	0
Cupriavidus	Betaproteobacteria	0	0	0	1	0	1	1	0	0	0	0	0	1	0	0	0	0
Delftia	Betaproteobacteria	0	0	1	1	0	0	0	0	0	0	0	0	0	0	0	0	0
Diaphorobacter	Betaproteobacteria	15	30	20	47	36	60	27	38	31	67	13	27	81	31	22	6	56
Hydrogenophilus thermoluteolus	Betaproteobacteria	0	0	0	0	0	0	0	0	0	0	0	0	1	0	0	0	1
Massilia timonae	Betaproteobacteria	0	0	0	0	0	1	1	0	0	1	0	0	2	2	0	0	1
Methylotenera	Betaproteobacteria	0	0	0	0	0	0	0	0	0	1	0	0	0	1	0	0	0
Methyloversatilis	Betaproteobacteria	0	1	0	0	1	0	1	0	1	0	0	0	2	0	0	0	0
Neisseria subflava	Betaproteobacteria	0	0	0	1	0	0	1	0	0	0	0	0	1	0	0	0	0
Oxalobacter formigenes	Betaproteobacteria	0	1	0	0	0	1	0	0	0	2	0	0	2	0	0	0	0
Oxalobacter	Betaproteobacteria	1	0	0	0	0	1	0	1	1	1	0	0	0	1	1	0	1
Pandoraea norimbergensis	Betaproteobacteria	0	0	0	0	0	2	0	0	0	1	0	0	2	1	0	0	0
Pandoraea	Betaproteobacteria	0	1	1	1	0	1	0	0	1	0	0	0	2	1	0	0	0
Ralstonia	Betaproteobacteria	0	0	0	0	0	1	0	0	2	0	0	0	1	0	1	0	2
Rhodocyclus tenuis	Betaproteobacteria	0	0	0	0	0	0	0	0	0	0	1	1	0	0	0	0	1
Rhodoferax	Betaproteobacteria	0	0	0	0	0	0	1	0	0	0	0	0	0	0	0	0	1
Simplicispira	Betaproteobacteria	0	0	1	1	1	1	1	1	0	0	1	0	1	1	1	0	1
Thauera	Betaproteobacteria	0	0	0	0	0	0	0	0	0	0	0	0	2	0	0	0	2
Thiobacillus	Betaproteobacteria	0	1	0	1	1	1	0	0	0	1	0	0	1	0	0	0	0
Thiomonas	Betaproteobacteria	0	3	0	0	2	1	0	0	3	1	4	2	4	2	0	0	2
Verminephrobacter eiseniae	Betaproteobacteria	0	0	0	0	0	0	0	0	0	0	0	0	0	0	1	0	1
Zoogloea	Betaproteobacteria	0	0	0	2	0	0	0	0	0	0	0	1	0	1	2	1	0
Zoogloea ramigera	Betaproteobacteria	0	0	0	1	0	1	0	0	0	0	0	0	0	1	0	0	1
Brachyspira corvi	Brachyspirae	0	1	0	0	1	2	2	0	0	1	0	0	2	0	0	0	0
Brachyspira	Brachyspirae	4	4	3	2	6	5	4	4	2	3	3	3	7	3	6	3	5
Caldilinea	Caldilineae	0	2	0	2	0	2	2	0	0	1	0	0	3	2	2	0	0
Parachlamydia acanthamoebae	Chlamydiae	0	0	1	1	0	0	0	0	1	0	1	1	1	1	1	1	0
Chlorobium phaeovibrioides	Chlorobia	0	0	0	0	0	0	0	0	0	0	0	0	1	0	0	1	0
Chloroherpeton thalassium	Chlorobia	0	1	0	0	0	0	1	0	0	0	0	0	1	0	0	0	0
Prosthecochloris	Chlorobia	0	0	0	0	0	0	0	0	0	0	0	0	1	0	0	1	0
Roseiflexus	Chloroflexi	0	0	0	0	0	2	0	0	0	1	0	0	2	0	0	0	0
Acetivibrio cellulolyticus	Clostridia	0	1	1	1	1	1	0	0	0	0	0	0	0	1	0	0	0
Acetobacterium	Clostridia	0	1	0	0	1	0	0	1	1	0	1	0	2	0	1	0	0
Alkaliphilus	Clostridia	0	0	0	0	0	0	0	1	0	0	0	0	1	0	0	0	0
Ammonifex	Clostridia	0	0	0	0	0	1	0	0	0	0	0	0	1	0	0	0	0
Anaerococcus prevotii	Clostridia	0	2	1	1	1	2	0	0	0	2	0	0	1	0	0	0	0
Anaerococcus	Clostridia	0	11	2	3	2	5	4	2	2	6	2	1	13	3	3	0	1
Anaerospora	Clostridia	0	1	0	0	0	0	0	0	0	0	0	0	1	0	0	0	0
Anaerovorax	Clostridia	0	0	0	0	0	0	1	1	0	0	0	0	1	0	0	0	0
Blautia producta	Clostridia	0	1	0	0	0	1	0	0	0	1	0	0	1	0	1	0	0
Blautia	Clostridia	0	7	1	5	1	5	3	2	1	3	1	2	10	3	5	4	2
Butyrivibrio	Clostridia	0	2	1	1	1	2	0	1	1	0	0	0	2	0	0	0	0
Caloramator	Clostridia	0	1	1	1	2	2	1	1	0	1	0	0	2	1	0	0	1
Caminicella	Clostridia	0	3	0	1	0	2	2	0	0	0	0	0	3	0	0	0	0
Clostridium bowmanii	Clostridia	0	0	0	0	0	0	0	0	0	0	1	0	1	0	0	0	0
Clostridium hiranonis	Clostridia	2	8	2	1	7	2	2	2	1	1	0	3	6	2	4	0	0
Clostridium piliforme	Clostridia	0	1	0	0	0	0	0	1	0	0	0	0	1	0	0	0	0
Clostridium sordellii	Clostridia	0	4	0	0	1	0	1	0	0	0	0	0	5	1	0	0	0
Flavonifractor plautii	Clostridia	0	0	0	0	0	0	1	0	0	0	0	0	1	0	0	0	0
Clostridium	Clostridia	1	30	2	5	18	12	12	2	2	5	3	2	38	6	7	3	2
Clostridium sp. SS2/1	Clostridia	0	1	2	0	0	0	1	0	0	0	0	0	3	0	2	0	0
Coprococcus	Clostridia	1	13	3	0	0	2	2	1	0	1	0	1	12	3	2	2	0
Dehalobacterium	Clostridia	0	1	0	1	0	1	1	0	0	1	0	0	2	0	0	0	0
Desulfitobacter	Clostridia	0	0	0	0	0	1	1	0	0	0	0	0	2	1	0	0	0
Desulfosporomusa	Clostridia	0	2	0	0	1	1	1	0	0	0	0	0	2	1	0	0	0
Desulfotomaculum	Clostridia	0	1	1	0	1	2	2	0	0	1	0	0	3	1	0	0	0
Epulopiscium	Clostridia	0	1	0	0	0	0	0	0	0	0	0	0	1	0	0	0	0
Eubacterium	Clostridia	0	5	0	0	2	3	2	1	1	1	1	0	6	2	2	0	0
Faecalibacterium prausnitzii	Clostridia	0	7	4	0	2	9	3	0	1	2	1	1	7	1	0	1	1
Faecalibacterium	Clostridia	1	10	7	6	7	7	7	3	6	5	5	2	13	5	7	1	2
Lachnospira	Clostridia	0	1	0	0	0	0	0	0	0	0	0	0	1	0	0	0	0
Megamonas hypermegale	Clostridia	0	1	0	1	1	0	0	1	0	0	0	0	1	1	0	0	0
Moorella	Clostridia	0	2	0	0	1	1	0	1	0	0	0	0	1	1	0	0	0
Moryella	Clostridia	0	1	0	0	0	1	1	0	0	0	0	0	1	0	0	0	0
Natronincola	Clostridia	0	1	0	0	0	1	0	1	0	0	1	0	1	0	0	0	0
Oscillospira	Clostridia	0	1	1	1	0	1	1	0	1	2	0	0	2	0	0	0	0
Pelotomaculum	Clostridia	0	0	1	0	0	1	0	0	1	0	0	1	1	1	0	0	0
Peptococcus	Clostridia	0	0	0	0	0	1	0	1	0	0	0	0	1	0	1	0	0
Peptoniphilus asaccharolyticus	Clostridia	1	2	0	0	0	0	0	2	0	1	0	0	1	2	1	0	0
Peptoniphilus	Clostridia	0	2	0	0	0	0	1	1	0	0	0	0	2	0	0	0	0
Eubacterium rectale	Clostridia	0	2	0	1	0	3	0	1	1	1	0	0	5	0	1	0	1
Ruminococcus	Clostridia	1	11	1	1	3	7	8	1	4	4	1	1	9	5	0	0	2
Sarcina	Clostridia	0	1	0	0	0	0	1	0	1	2	0	0	2	1	0	0	0
Sedimentibacter	Clostridia	0	1	0	0	0	0	1	0	0	0	0	0	0	0	0	0	0
Shuttleworthia	Clostridia	0	2	0	0	0	0	1	0	0	0	0	0	2	0	0	0	0
Syntrophomonas	Clostridia	0	0	0	0	0	0	0	0	0	1	0	0	1	0	0	0	0
Thermincola	Clostridia	0	0	0	1	0	1	0	0	0	0	0	0	1	0	0	0	0
Tissierella	Clostridia	0	0	0	0	0	0	1	0	0	0	0	0	1	0	0	0	0
Veillonella	Clostridia	0	3	0	0	0	3	1	0	0	2	0	0	3	1	1	0	0
Veillonella dispar	Clostridia	0	1	0	1	0	0	0	0	0	0	1	0	1	0	0	0	0
Caldithrix	Deferribacteres	0	1	0	1	0	1	1	0	0	0	0	0	1	1	0	0	0
Dehalogenimonas	Dehalococcoidetes	0	1	0	0	0	0	0	1	0	0	0	0	2	0	0	0	0
Deinococcus frigens	Deinococci	0	0	0	0	0	1	0	0	0	1	0	0	0	0	1	0	0
Deinococcus maricopensis	Deinococci	0	0	0	1	0	0	0	0	0	0	0	0	1	0	0	0	0
Deinococcus radiodurans	Deinococci	1	1	1	1	1	1	1	1	1	1	0	1	1	1	1	1	1
Deinococcus	Deinococci	1	4	2	4	4	6	3	1	4	4	0	1	5	3	2	1	1
Thermus	Deinococci	1	1	0	0	0	0	0	0	0	0	0	0	0	0	0	0	0
Anaeromyxobacter	Deltaproteobacteria	0	1	1	1	0	1	1	0	0	1	0	0	3	1	0	0	0
Bdellovibrio bacteriovorus	Deltaproteobacteria	0	1	0	0	0	1	1	0	0	0	0	0	1	0	0	0	0
Bdellovibrio	Deltaproteobacteria	0	0	0	0	0	1	1	0	0	0	0	0	1	0	0	0	0
Corallococcus	Deltaproteobacteria	0	0	0	0	0	1	0	0	0	0	0	0	1	0	0	0	0
Cystobacter fuscus	Deltaproteobacteria	0	0	0	0	0	0	3	0	0	0	0	0	3	0	0	0	0
Cystobacter	Deltaproteobacteria	0	0	0	0	0	0	4	0	0	0	0	0	4	0	0	0	0
Desulfobacca	Deltaproteobacteria	0	1	0	0	0	0	0	0	0	0	0	0	1	0	0	0	0
Desulfobacterium	Deltaproteobacteria	0	1	1	1	1	1	2	0	0	1	0	0	2	1	1	0	0
Desulfocapsa	Deltaproteobacteria	0	0	0	0	0	0	2	0	0	0	0	0	2	0	0	0	0
Desulfococcus	Deltaproteobacteria	0	1	0	0	0	0	1	0	0	0	0	0	2	1	0	0	0
Desulfomicrobium thermophilum	Deltaproteobacteria	0	1	0	1	0	0	0	0	0	0	0	0	1	0	0	0	0
Desulfomicrobium	Deltaproteobacteria	0	1	1	1	0	1	0	0	1	0	1	1	1	0	0	1	0
Desulfomonile	Deltaproteobacteria	0	1	0	0	0	0	1	0	0	0	0	0	0	0	0	0	0
Desulfonatronovibrio	Deltaproteobacteria	0	0	0	1	0	0	1	0	0	0	0	0	1	0	0	0	0
Desulfonauticus	Deltaproteobacteria	0	0	0	0	0	0	1	0	0	0	0	0	1	0	0	0	0
Desulfovermiculus	Deltaproteobacteria	0	1	0	0	1	0	1	0	0	0	0	0	1	0	0	0	0
Desulfovibrio	Deltaproteobacteria	0	0	0	0	0	0	0	0	1	0	0	0	1	0	0	0	0
Desulfovibrio capillatus	Deltaproteobacteria	0	0	0	0	0	0	0	0	0	0	0	0	1	1	0	0	0
Desulfovibrio dechloracetivorans	Deltaproteobacteria	0	2	1	0	1	1	0	0	0	1	1	0	1	0	0	0	0
Desulfovibrio putealis	Deltaproteobacteria	0	1	0	0	1	1	1	0	0	0	0	0	1	0	0	0	0
Desulfovibrio salexigens	Deltaproteobacteria	0	1	0	0	0	0	0	0	0	0	1	0	0	0	0	0	0
Desulfovibrio	Deltaproteobacteria	0	5	0	1	0	1	1	1	0	0	3	0	6	1	0	0	0
Desulfurella	Deltaproteobacteria	0	1	1	1	0	1	0	1	0	1	1	1	1	1	1	0	0
Desulfuromonas	Deltaproteobacteria	0	1	0	0	0	0	0	0	0	0	0	0	1	0	0	0	0
Geobacter	Deltaproteobacteria	0	1	0	1	1	3	2	0	0	1	0	0	2	0	0	0	0
Haliangium	Deltaproteobacteria	0	0	0	0	0	0	1	0	0	0	0	0	1	0	0	0	0
Corallococcus macrosporus	Deltaproteobacteria	0	0	0	1	0	1	0	0	0	0	0	1	2	0	1	1	0
Myxococcus	Deltaproteobacteria	0	1	0	0	0	1	3	0	0	1	0	0	4	0	0	0	1
Nannocystis	Deltaproteobacteria	0	1	0	0	0	0	1	0	0	0	0	0	1	0	0	0	0
Nitrospina	Deltaproteobacteria	0	2	0	1	0	1	1	1	1	0	0	0	3	1	1	0	0
Pelobacter	Deltaproteobacteria	0	0	0	0	0	1	0	0	1	1	0	0	0	1	0	0	0
Plesiocystis	Deltaproteobacteria	0	1	0	1	1	1	1	0	0	0	0	0	2	1	1	0	0
Syntrophobacter	Deltaproteobacteria	0	0	0	1	0	1	2	0	0	1	0	0	2	0	0	0	0
Dictyoglomus turgidum	Dictyoglomia	0	1	1	0	1	1	0	0	0	0	0	0	1	1	0	0	0
Arcobacter	Epsilonproteobacteria	0	1	0	1	1	2	0	1	1	1	1	0	2	1	1	0	0
Campylobacter	Epsilonproteobacteria	0	0	0	0	1	1	0	0	0	0	0	0	2	0	0	0	0
Helicobacter cinaedi	Epsilonproteobacteria	0	1	1	0	0	1	0	0	0	1	0	0	1	0	0	0	0
Helicobacter felis	Epsilonproteobacteria	0	0	0	0	0	1	1	1	0	0	0	0	1	0	1	0	0
Helicobacter pylori	Epsilonproteobacteria	0	0	0	1	0	1	0	0	0	0	0	0	0	0	0	0	0
Sulfuricurvum	Epsilonproteobacteria	0	1	0	0	0	1	0	0	0	0	0	0	1	0	0	1	0
Sulfurimonas	Epsilonproteobacteria	0	1	0	0	0	0	0	1	0	1	0	0	1	1	0	0	0
Sulfurovum	Epsilonproteobacteria	2	1	1	1	0	1	0	0	0	2	0	0	0	0	0	0	0
Allobaculum	Erysipelotrichi	0	7	1	1	1	2	1	1	2	3	2	0	5	0	5	1	2
Eubacterium biforme	Erysipelotrichi	0	0	0	0	0	0	0	0	0	0	1	1	0	1	1	1	0
Catenibacterium mitsuokai	Erysipelotrichi	0	0	0	2	0	0	0	0	0	0	0	0	0	1	1	0	2
Fibrobacter succinogenes	Fibrobacteres	0	0	0	0	0	3	4	0	0	0	0	0	4	0	0	0	0
Fibrobacter	Fibrobacteres	1	1	1	1	1	1	0	1	1	1	1	1	1	1	1	1	1
Algibacter	Flavobacteria	0	0	0	0	0	1	0	0	0	0	0	0	1	0	0	0	0
Bizionia	Flavobacteria	0	1	0	0	0	0	0	0	0	0	0	0	1	0	0	0	0
Candidatus Sulcia muelleri	Flavobacteria	0	1	1	1	0	0	0	1	1	0	0	1	2	1	1	0	1
Capnocytophaga	Flavobacteria	0	1	1	0	1	1	1	0	0	1	0	1	1	0	1	0	0
Chryseobacterium	Flavobacteria	0	2	1	0	0	0	0	0	0	2	1	0	3	0	0	0	0
Flavobacterium columnare	Flavobacteria	0	0	0	0	0	0	0	0	1	0	1	0	0	0	1	1	0
Flavobacterium succinicans	Flavobacteria	0	1	0	0	0	0	0	0	0	0	0	0	1	0	1	0	0
Flavobacterium	Flavobacteria	1	1	1	2	1	2	0	1	1	0	1	1	3	1	1	1	0
Fluviicola	Flavobacteria	0	1	0	0	1	1	1	0	0	1	0	0	1	0	0	0	0
Leeuwenhoekiella marinoflava	Flavobacteria	0	0	0	0	0	0	0	1	1	0	0	0	0	0	0	0	0
Maribacter	Flavobacteria	0	0	0	0	1	2	1	0	0	0	0	0	2	0	0	0	0
Muricauda	Flavobacteria	0	0	0	0	2	1	0	0	0	0	2	0	4	2	0	0	0
Sejongia	Flavobacteria	0	0	0	0	0	0	0	0	0	1	0	0	1	0	0	0	0
Ulvibacter	Flavobacteria	1	1	1	1	1	1	1	1	1	1	1	1	0	1	1	1	1
Cetobacterium	Fusobacteria	0	0	0	0	0	1	0	0	0	0	0	0	1	0	0	0	0
Leptotrichia	Fusobacteria	0	1	0	0	0	0	0	0	0	0	0	0	1	0	0	0	0
Achromatium	Gammaproteobacteria	0	1	1	0	0	1	0	0	0	0	0	0	1	1	1	0	0
Acidithiobacillus ferrooxidans	Gammaproteobacteria	0	0	1	0	0	1	0	0	0	0	0	0	0	0	1	0	1
Acidithiobacillus	Gammaproteobacteria	0	0	0	0	0	1	0	0	0	0	0	0	1	0	0	0	0
Acinetobacter johnsonii	Gammaproteobacteria	0	2	1	3	2	4	3	0	2	3	0	0	6	0	3	0	2
Acinetobacter lwoffii	Gammaproteobacteria	0	0	0	2	1	0	0	1	1	1	0	1	2	1	1	0	0
Acinetobacter rhizosphaerae	Gammaproteobacteria	0	0	1	1	0	1	0	0	0	0	0	0	1	0	0	0	0
Acinetobacter schindleri	Gammaproteobacteria	0	0	0	1	0	0	0	1	0	1	1	0	1	0	0	0	0
Acinetobacter	Gammaproteobacteria	1	4	2	3	1	7	4	2	2	6	3	0	10	2	1	1	5
Actinobacillus capsulatus	Gammaproteobacteria	0	0	0	0	1	0	0	1	0	0	0	1	0	0	0	0	0
Actinobacillus indolicus	Gammaproteobacteria	0	0	0	0	1	0	0	0	0	0	0	0	1	0	0	0	0
Actinobacillus	Gammaproteobacteria	0	0	1	0	1	0	0	0	0	0	0	0	1	0	0	0	0
Aeromonas	Gammaproteobacteria	0	2	2	1	2	1	1	1	1	1	1	1	2	1	0	0	2
Alcanivorax venustensis	Gammaproteobacteria	0	0	0	1	0	1	0	0	0	0	0	0	1	0	0	0	0
Aliivibrio	Gammaproteobacteria	0	0	0	0	1	0	0	0	0	0	0	0	1	0	0	0	0
Alkalispirillum	Gammaproteobacteria	0	1	0	1	0	1	1	1	0	1	1	1	1	0	0	0	0
Alkanindiges	Gammaproteobacteria	0	0	0	0	0	0	0	0	0	0	0	0	1	0	1	0	0
Allochromatium vinosum	Gammaproteobacteria	0	0	0	0	0	0	1	0	0	0	0	0	1	0	0	0	0
Aquicella	Gammaproteobacteria	0	0	0	0	0	0	1	0	0	0	0	0	1	0	0	0	0
Azomonas macrocytogenes	Gammaproteobacteria	0	1	0	0	0	0	0	0	0	0	0	0	1	0	0	0	0
Beggiatoa	Gammaproteobacteria	0	0	2	0	2	2	1	0	0	0	0	0	2	2	0	0	1
Bibersteinia trehalosi	Gammaproteobacteria	0	0	0	0	0	0	1	0	0	0	0	0	1	0	0	0	0
Brenneria rubrifaciens	Gammaproteobacteria	0	0	1	0	1	0	0	0	0	0	0	0	1	0	0	0	0
Candidatus Portiera	Gammaproteobacteria	0	2	2	2	2	1	0	1	2	2	2	0	3	0	0	0	0
Cellvibrio	Gammaproteobacteria	0	1	0	0	0	1	0	0	0	0	0	0	1	0	0	0	0
Chelonobacter	Gammaproteobacteria	0	0	0	0	0	0	0	0	1	0	1	1	0	1	1	1	1
Chromatium	Gammaproteobacteria	0	0	0	0	0	0	0	0	0	0	0	0	1	0	0	0	1
Citrobacter	Gammaproteobacteria	1	2	1	0	2	3	3	8	0	2	0	0	8	1	4	0	0
Colwellia psychrerythraea	Gammaproteobacteria	0	0	0	0	0	0	0	0	1	0	1	0	1	1	1	1	0
Congregibacter	Gammaproteobacteria	0	2	0	1	1	0	1	0	0	0	1	0	0	0	0	0	0
Coxiella	Gammaproteobacteria	0	0	0	0	1	2	2	0	0	0	0	0	2	1	0	0	0
Dichelobacter nodosus	Gammaproteobacteria	0	0	0	0	0	1	0	0	0	0	0	0	1	0	0	0	0
Dyella ginsengisoli	Gammaproteobacteria	0	0	0	1	0	0	0	0	0	0	0	0	1	0	0	0	0
Dyella	Gammaproteobacteria	0	0	0	0	0	0	1	0	2	0	0	0	1	0	0	0	2
Edwardsiella ictaluri	Gammaproteobacteria	0	0	1	0	0	0	0	0	0	0	0	0	1	0	0	0	0
Edwardsiella tarda	Gammaproteobacteria	0	0	0	0	0	0	0	2	0	0	0	0	1	0	1	0	0
Edwardsiella	Gammaproteobacteria	0	0	0	0	0	0	1	2	0	0	0	0	2	0	0	0	0
Enterobacter hormaechei	Gammaproteobacteria	0	1	0	0	0	0	1	3	1	1	1	1	1	1	2	1	0
Erwinia	Gammaproteobacteria	0	0	0	0	0	1	0	1	1	0	1	0	0	1	2	1	0
Escherichia	Gammaproteobacteria	1	6	3	0	1	3	0	4	0	3	2	3	6	1	12	2	4
Ferrimonas	Gammaproteobacteria	0	0	0	0	0	0	1	0	0	0	0	0	1	0	0	0	0
Frateuria aurantia	Gammaproteobacteria	0	0	0	0	0	0	0	0	2	0	0	0	0	0	1	0	1
Frateuria	Gammaproteobacteria	0	0	0	0	0	0	0	1	0	0	0	0	1	0	0	0	0
Haemophilus	Gammaproteobacteria	1	0	1	0	1	0	0	1	0	1	1	1	0	1	1	1	0
Halomonas salaria	Gammaproteobacteria	0	0	0	0	0	0	1	0	0	0	0	0	1	0	0	0	0
Halomonas nitritophilus	Gammaproteobacteria	0	0	1	0	1	0	0	0	0	0	0	0	0	1	0	0	0
Halomonas	Gammaproteobacteria	0	3	2	0	2	8	2	0	1	2	0	0	8	1	0	0	1
Ignatzschineria	Gammaproteobacteria	0	0	1	0	1	1	0	0	1	0	0	0	0	1	0	0	1
Kangiella	Gammaproteobacteria	0	0	1	0	0	1	0	1	0	1	0	0	0	0	0	1	1
Klebsiella variicola	Gammaproteobacteria	0	0	0	0	0	0	0	1	0	0	0	0	0	0	0	0	1
Klebsiella	Gammaproteobacteria	0	0	1	0	0	2	4	5	0	2	1	0	4	0	5	0	2
Leclercia	Gammaproteobacteria	0	0	0	0	0	0	0	2	0	0	0	0	1	0	3	0	0
Legionella	Gammaproteobacteria	0	0	0	0	2	1	0	0	0	1	0	0	2	0	0	0	1
Leucothrix	Gammaproteobacteria	0	0	0	0	0	1	0	0	0	0	0	0	1	0	0	0	0
Luteibacter	Gammaproteobacteria	0	0	0	0	0	0	0	0	1	0	0	0	0	0	0	0	1
Lysobacter	Gammaproteobacteria	0	0	0	0	0	0	0	0	0	0	1	0	1	0	0	0	0
Marinobacter	Gammaproteobacteria	0	0	1	0	0	2	1	0	0	0	0	0	2	0	0	0	0
Methylobacter	Gammaproteobacteria	0	0	1	0	0	0	0	1	1	0	1	1	0	0	0	0	0
Methylocaldum	Gammaproteobacteria	0	1	0	0	1	1	1	0	2	0	0	0	1	0	0	0	2
Methylomonas rubra	Gammaproteobacteria	0	0	0	0	0	0	0	0	0	1	0	0	1	0	0	0	0
Methylomonas	Gammaproteobacteria	0	1	0	0	0	0	0	0	0	0	0	0	1	0	0	0	0
Moritella	Gammaproteobacteria	0	0	0	0	0	1	1	0	0	0	0	1	1	0	0	0	0
Nitrosococcus oceani	Gammaproteobacteria	1	1	1	1	1	1	2	1	0	0	0	0	3	1	1	0	1
Pantoea ananatis	Gammaproteobacteria	0	1	2	1	1	1	0	1	1	1	2	0	2	2	1	0	2
Pantoea	Gammaproteobacteria	0	2	1	1	1	1	1	1	0	2	2	0	3	1	2	1	2
Photobacterium rosenbergii	Gammaproteobacteria	0	1	0	0	1	0	0	0	0	1	1	0	2	0	0	0	0
Photobacterium	Gammaproteobacteria	0	0	0	0	0	0	1	0	0	1	0	0	0	0	1	0	1
Photorhabdus	Gammaproteobacteria	0	0	0	0	0	0	0	0	0	0	0	0	1	0	0	0	1
Proteus mirabilis	Gammaproteobacteria	0	0	0	1	1	0	0	0	0	0	0	0	1	0	0	0	1
Providencia	Gammaproteobacteria	0	0	0	0	0	0	0	1	0	1	1	0	0	0	0	0	1
Pseudoalteromonas haloplanktis	Gammaproteobacteria	0	0	1	0	0	0	0	3	0	2	0	3	3	0	0	3	3
Pseudoalteromonas issachenkonii	Gammaproteobacteria	0	0	0	0	0	0	0	3	0	3	0	1	3	0	0	3	3
Pseudoalteromonas porphyrae	Gammaproteobacteria	0	0	0	0	0	0	0	1	0	1	0	0	2	0	0	0	2
Pseudoalteromonas rubra	Gammaproteobacteria	0	0	0	0	0	0	0	0	0	1	0	0	0	0	0	0	1
Pseudoalteromonas tunicata	Gammaproteobacteria	0	0	0	0	0	0	0	0	0	0	1	1	0	0	0	0	0
Pseudoalteromonas	Gammaproteobacteria	8	4	14	2	2	7	3	66	6	57	2	23	60	4	6	57	73
Pseudomonas mendocina	Gammaproteobacteria	0	2	1	0	1	2	0	1	0	2	1	0	1	0	2	0	1
Pseudomonas mosselii	Gammaproteobacteria	1	0	0	0	0	1	0	1	0	1	0	0	0	0	0	0	0
Pseudomonas stutzeri	Gammaproteobacteria	1	0	1	2	1	1	0	0	1	0	0	0	2	1	2	0	1
Pseudomonas	Gammaproteobacteria	8	34	22	17	15	31	15	14	20	14	15	16	47	22	15	11	24
Pseudoxanthomonas mexicana	Gammaproteobacteria	0	1	1	1	1	1	0	0	1	0	0	0	1	1	1	0	1
Psychrobacter	Gammaproteobacteria	0	3	0	2	0	2	0	2	2	3	0	1	2	1	3	0	2
Psychromonas	Gammaproteobacteria	0	1	0	0	1	0	0	0	0	0	0	0	1	0	0	0	1
Rahnella	Gammaproteobacteria	0	0	0	0	0	0	0	1	0	0	0	0	0	0	0	0	1
Rheinheimera aquimaris	Gammaproteobacteria	0	0	0	0	0	0	0	0	1	0	0	0	1	0	0	0	0
Rhodanobacter	Gammaproteobacteria	0	0	0	0	0	1	0	0	5	0	0	0	2	0	0	0	5
Rickettsiella grylli	Gammaproteobacteria	0	0	0	0	0	1	1	0	0	0	0	0	1	0	0	0	0
Rickettsiella	Gammaproteobacteria	0	1	2	0	1	1	1	1	1	0	0	1	2	2	1	1	0
Saccharospirillum	Gammaproteobacteria	0	0	0	0	0	0	1	0	0	0	0	0	1	0	0	0	0
Salinisphaera	Gammaproteobacteria	0	1	0	0	0	0	0	0	0	0	0	0	1	0	0	0	0
Salmonella enterica	Gammaproteobacteria	1	1	1	2	2	1	0	1	1	1	2	1	3	2	2	1	2
Salmonella	Gammaproteobacteria	0	1	0	0	0	0	0	0	0	0	0	0	1	0	0	0	0
Sedimenticola	Gammaproteobacteria	0	0	0	0	1	3	2	0	0	1	0	0	3	0	0	0	0
Serratia marcescens	Gammaproteobacteria	0	2	2	1	2	2	1	1	3	2	2	2	2	2	1	1	2
Serratia symbiotica	Gammaproteobacteria	0	0	0	0	0	0	0	0	0	1	1	0	1	0	0	0	1
Serratia	Gammaproteobacteria	0	1	0	0	0	1	0	1	0	1	1	0	2	0	0	0	1
Shewanella benthica	Gammaproteobacteria	0	0	0	0	0	1	0	0	0	0	0	0	1	1	0	0	1
Shewanella	Gammaproteobacteria	0	1	0	0	1	1	0	1	1	1	1	1	1	1	1	1	0
Shigella	Gammaproteobacteria	0	1	0	1	1	0	0	5	0	0	0	1	2	0	5	0	2
Sodalis	Gammaproteobacteria	0	1	0	0	0	0	0	1	0	1	1	1	1	0	0	0	0
Stenotrophomonas	Gammaproteobacteria	0	0	0	0	0	0	0	0	0	0	0	0	1	1	1	0	0
Succinivibrio	Gammaproteobacteria	1	2	3	3	1	5	2	0	1	2	1	0	7	1	2	0	0
Tatlockia	Gammaproteobacteria	0	0	0	0	1	0	0	0	0	0	0	0	1	0	0	0	0
Pantoea citrea	Gammaproteobacteria	0	0	0	0	0	0	0	1	0	0	0	0	0	0	1	0	0
Thalassomonas	Gammaproteobacteria	0	0	0	0	0	1	0	1	0	1	0	0	2	0	0	0	2
Thiohalorhabdus	Gammaproteobacteria	0	0	0	0	0	1	1	0	0	0	0	0	1	0	0	0	0
Thiomicrospira	Gammaproteobacteria	2	1	1	2	2	1	0	2	2	3	2	1	2	0	3	2	1
Citrobacter farmeri	Gammaproteobacteria	0	1	0	0	0	0	0	0	0	0	0	0	0	0	0	0	1
Vibrio	Gammaproteobacteria	1	8	8	4	6	5	3	64	3	62	82	7	31	2	0	0	89
Vibrio aestuarianus	Gammaproteobacteria	0	0	0	0	0	0	0	0	0	0	2	0	0	0	0	0	2
Vibrio campbellii	Gammaproteobacteria	0	0	1	0	0	0	0	1	0	0	2	0	2	0	0	0	3
Vibrio cholerae	Gammaproteobacteria	0	0	0	0	0	0	0	1	0	0	1	0	0	0	1	0	0
Vibrio fortis	Gammaproteobacteria	0	0	0	0	0	0	0	2	0	2	2	0	0	0	0	0	3
Vibrio harveyi	Gammaproteobacteria	1	2	2	2	2	2	1	9	0	5	14	1	5	2	0	0	10
Vibrio kanaloae	Gammaproteobacteria	0	0	0	0	0	0	0	1	0	2	0	0	2	0	0	0	1
Vibrio metschnikovii	Gammaproteobacteria	0	0	0	0	1	0	0	0	0	0	1	0	1	0	0	0	1
Vibrio orientalis	Gammaproteobacteria	0	2	1	0	0	0	0	4	0	3	5	1	4	0	0	0	4
Vibrio rotiferianus	Gammaproteobacteria	0	0	0	0	0	0	0	1	0	1	3	0	0	0	0	0	3
Vibrio tapetis	Gammaproteobacteria	0	0	1	0	0	0	0	0	0	1	1	1	0	0	0	0	1
Xanthomonas axonopodis	Gammaproteobacteria	0	1	0	0	1	2	1	0	1	1	0	0	2	1	1	0	0
Xenorhabdus bovienii	Gammaproteobacteria	0	1	1	0	1	1	0	0	0	1	0	0	0	0	0	0	0
Yersinia mollaretii	Gammaproteobacteria	0	0	0	0	0	0	0	0	0	1	1	0	0	0	1	0	1
Gemmatimonas	Gemmatimonadetes	0	1	0	0	0	1	1	0	0	0	0	0	1	0	0	0	0
Geothrix	Holophagae	0	1	0	0	0	1	0	0	0	0	0	0	1	0	0	0	0
Ktedonobacter	Ktedonobacteria	0	1	1	1	1	3	0	0	1	2	0	1	2	2	0	0	1
Candidatus Scalindua brodae	Kueneniae	0	0	0	0	0	1	0	0	0	1	0	0	1	0	0	0	0
Candidatus Scalindua	Kueneniae	0	0	0	0	0	0	0	1	1	1	0	0	0	1	1	0	0
Leptospira alexanderi	Leptospirae	0	0	0	0	0	0	0	0	0	0	0	1	0	1	1	0	0
Leptospira licerasiae	Leptospirae	0	1	1	1	1	1	1	0	1	1	0	0	1	1	1	0	0
Leptospira	Leptospirae	0	3	1	0	2	1	2	0	0	0	0	0	5	0	0	0	0
Candidatus Phytoplasma fraxini	Mollicutes	0	1	0	0	0	1	0	0	0	0	0	0	1	0	0	0	0
Candidatus Phytoplasma prunorum	Mollicutes	0	0	0	0	0	1	1	0	0	0	0	0	1	0	0	0	0
Candidatus Phytoplasma	Mollicutes	0	8	1	1	1	2	2	1	1	3	0	1	7	1	4	0	0
Mycoplasma arthritidis	Mollicutes	0	1	0	0	0	0	0	0	0	0	0	0	1	0	1	0	0
Mycoplasma hominis	Mollicutes	0	1	0	0	0	0	0	0	0	0	0	0	1	0	1	0	0
Mycoplasma phocidae	Mollicutes	0	1	0	0	0	0	0	0	0	0	0	0	1	0	0	0	0
Mycoplasma testudineum	Mollicutes	0	0	0	0	0	0	1	0	0	0	0	0	1	0	1	0	0
Mycoplasma	Mollicutes	2	6	2	1	2	3	2	3	3	4	2	2	6	3	6	2	2
Spiroplasma	Mollicutes	0	2	0	1	1	1	2	0	1	2	0	0	3	0	1	0	0
Ureaplasma parvum	Mollicutes	0	0	1	1	0	0	0	0	1	0	1	0	1	1	1	1	0
Leptospirillum ferriphilum	Nitrospira	0	1	0	0	0	0	0	0	0	0	1	0	0	0	0	1	0
Leptospirillum ferrodiazotrophum	Nitrospira	0	0	0	0	1	1	0	0	0	0	0	0	1	0	0	0	0
Nitrospira	Nitrospira	0	0	0	1	0	2	4	1	1	0	0	0	4	5	0	0	0
Anabaena cylindrica	Nostocophycideae	0	0	0	0	1	0	1	0	1	0	1	1	1	0	0	0	0
Anabaena	Nostocophycideae	0	1	1	0	0	1	0	1	1	1	1	0	1	0	0	0	0
Aphanizomenon issatschenkoi	Nostocophycideae	0	0	0	0	0	0	0	0	2	0	0	0	2	0	0	0	0
Dolichospermum	Nostocophycideae	0	1	0	0	0	0	0	0	3	0	0	0	3	0	0	0	0
Fischerella muscicola	Nostocophycideae	0	1	0	0	0	0	0	0	1	0	0	0	0	0	0	0	0
Nodularia sphaerocarpa	Nostocophycideae	1	1	1	1	1	1	0	0	1	1	0	0	1	0	1	0	0
Nodularia	Nostocophycideae	0	0	0	0	0	1	1	0	1	0	0	0	1	1	0	0	0
Nostoc	Nostocophycideae	1	2	0	0	0	1	0	1	2	1	1	2	2	1	1	0	0
Arthrospira fusiformis	Oscillatoriophycideae	0	1	0	0	0	0	0	0	1	0	0	0	1	0	0	0	0
Arthrospira	Oscillatoriophycideae	0	4	0	0	0	0	2	3	4	0	0	0	3	0	0	0	0
Chroococcidiopsis	Oscillatoriophycideae	0	1	0	0	0	0	1	0	2	2	1	1	1	0	0	0	0
Geitlerinema	Oscillatoriophycideae	0	1	0	0	0	0	0	0	0	0	0	0	1	0	0	0	0
Lyngbya bouillonii	Oscillatoriophycideae	1	1	1	1	1	1	1	1	1	1	1	1	0	1	1	1	1
Lyngbya	Oscillatoriophycideae	0	1	0	0	0	0	0	0	0	1	0	0	0	0	0	0	0
Microcoleus	Oscillatoriophycideae	0	1	1	0	1	0	1	0	2	1	2	2	2	1	0	0	0
Microcystis viridis	Oscillatoriophycideae	0	0	1	0	0	1	0	1	1	1	0	1	1	0	0	0	1
Microcystis	Oscillatoriophycideae	2	1	2	3	4	3	2	4	3	1	1	2	2	2	2	2	2
Oscillatoria	Oscillatoriophycideae	0	1	0	0	0	0	0	2	0	0	1	2	0	0	0	0	0
Phormidium animale	Oscillatoriophycideae	0	1	0	1	0	0	0	1	2	0	1	0	2	0	0	0	0
Phormidium	Oscillatoriophycideae	0	3	1	0	0	0	0	2	4	1	2	1	3	0	0	0	0
Planktothrix agardhii	Oscillatoriophycideae	0	0	0	0	0	0	0	0	1	1	0	0	1	0	0	0	0
Planktothrix mougeotii	Oscillatoriophycideae	0	1	0	0	0	0	0	0	0	0	1	1	0	0	0	0	0
Planktothrix pseudagardhii	Oscillatoriophycideae	0	1	0	0	1	0	0	1	1	1	0	1	0	0	0	0	0
Planktothrix	Oscillatoriophycideae	0	5	0	0	1	0	0	2	2	1	2	1	1	0	0	0	0
Symploca	Oscillatoriophycideae	0	1	0	0	0	0	0	0	1	1	1	0	1	0	0	0	0
Synechococcus	Oscillatoriophycideae	0	1	1	1	1	1	1	1	1	1	0	0	2	1	1	0	0
Trichodesmium	Oscillatoriophycideae	0	2	0	0	0	0	0	1	1	1	1	1	2	0	1	0	0
Gemmata	Planctomycea	0	0	0	0	0	0	0	2	3	0	0	0	3	5	2	0	0
Isosphaera	Planctomycea	0	0	0	0	0	0	0	0	0	0	0	0	1	1	0	0	0
Planctomyces	Planctomycea	4	6	7	9	10	11	6	3	4	3	0	0	10	7	4	1	0
Rhodopirellula baltica	Planctomycea	0	0	0	0	2	0	3	0	0	0	0	0	3	0	0	0	0
Rhodopirellula	Planctomycea	0	1	1	5	8	7	9	0	0	0	0	0	12	2	0	0	0
Candidatus Solibacter	Solibacteres	0	3	1	0	3	3	4	0	2	1	0	0	9	7	1	0	0
Adhaeribacter	Sphingobacteria	0	0	0	0	0	0	2	0	0	0	0	0	2	0	0	0	0
Aquiflexum	Sphingobacteria	0	0	0	1	0	0	1	0	0	0	0	0	1	0	0	0	0
Candidatus Amoebophilus asiaticus	Sphingobacteria	1	0	1	0	0	0	0	1	1	1	0	0	1	1	1	0	0
Candidatus Amoebophilus	Sphingobacteria	1	6	12	3	3	9	6	0	12	1	0	0	14	6	8	0	1
Candidatus Aquirestis	Sphingobacteria	0	1	0	1	0	0	0	1	0	0	0	0	1	0	0	0	0
Cyclobacterium marinum	Sphingobacteria	0	0	0	0	0	0	1	0	0	0	0	0	1	0	0	0	0
Cytophaga	Sphingobacteria	1	1	1	1	1	1	1	0	1	1	0	1	0	1	1	1	0
Dyadobacter	Sphingobacteria	0	0	0	0	0	0	1	0	0	0	0	0	1	0	0	0	0
Fulvivirga	Sphingobacteria	1	0	1	1	0	1	0	0	1	1	0	0	1	1	1	1	0
Hymenobacter	Sphingobacteria	0	0	1	0	0	0	0	0	1	0	0	0	0	0	0	0	1
Lewinella	Sphingobacteria	0	1	0	0	0	0	0	0	0	0	0	0	1	0	0	0	0
Persicobacter	Sphingobacteria	0	1	0	0	0	0	1	0	0	0	0	0	2	0	0	0	0
Runella	Sphingobacteria	1	1	1	1	1	1	0	0	1	1	0	0	1	1	1	0	0
Salinibacter	Sphingobacteria	0	0	0	2	2	2	1	0	0	0	0	0	4	2	0	0	1
Sphingobacterium multivorum	Sphingobacteria	0	0	0	0	0	0	0	0	1	0	0	0	1	0	0	0	0
Thermonema	Sphingobacteria	0	0	0	0	0	0	0	0	1	0	0	0	1	0	0	0	0
Borrelia burgdorferi	Spirochaetes	0	1	0	0	0	0	1	0	0	0	0	0	1	0	0	0	0
Borrelia garinii	Spirochaetes	0	1	0	1	1	1	1	0	0	0	0	0	1	1	1	0	0
Borrelia lonestari	Spirochaetes	1	0	1	0	0	1	0	1	1	1	1	1	0	1	1	1	1
Borrelia sinica	Spirochaetes	0	1	0	0	0	0	1	0	0	0	0	0	0	0	0	0	0
Borrelia turdi	Spirochaetes	0	1	0	0	0	0	1	0	0	0	0	0	1	0	0	0	0
Borrelia	Spirochaetes	0	4	0	0	1	4	3	1	1	0	0	1	4	0	3	2	0
Sphaerochaeta	Spirochaetes	0	0	0	0	0	0	1	0	0	0	0	0	1	0	0	0	0
Spirochaeta	Spirochaetes	0	4	2	3	2	3	4	0	3	2	1	1	5	1	3	0	0
Treponema	Spirochaetes	0	4	0	1	0	1	4	0	1	2	0	0	9	2	3	1	1
Acaryochloris	Synechococcophycideae	1	1	2	2	2	1	1	1	2	2	2	1	2	1	1	1	0
Halomicronema	Synechococcophycideae	0	1	1	1	0	1	1	1	1	1	1	1	1	1	1	0	0
Leptolyngbya	Synechococcophycideae	1	3	1	0	2	2	4	3	4	2	2	3	6	2	2	2	1
Prochlorococcus	Synechococcophycideae	6	9	1	9	11	0	9	6	6	2	6	4	13	6	7	5	0
Synechococcus	Synechococcophycideae	0	0	0	1	0	0	0	0	0	0	0	0	1	0	0	0	0
Anaerobaculum	Synergistia	0	0	0	0	1	1	0	0	0	0	0	0	0	2	0	0	0
Candidatus Tammella	Synergistia	0	0	1	0	0	1	1	0	0	0	0	0	1	0	1	0	0
Marinitoga	Thermotogae	0	0	0	0	0	1	0	0	0	1	0	0	0	0	0	0	0
Akkermansia muciniphila	Verrucomicrobiae	1	4	1	2	7	3	4	1	2	3	1	1	4	1	0	0	0
Akkermansia	Verrucomicrobiae	0	6	0	4	15	1	5	1	1	0	0	0	17	3	0	0	1
Haloferula	Verrucomicrobiae	0	0	0	0	1	0	1	0	0	0	0	0	1	0	0	0	0
Prosthecobacter debontii	Verrucomicrobiae	0	0	0	0	1	0	0	0	0	0	0	0	1	0	0	0	0
Rubritalea	Verrucomicrobiae	0	0	0	0	0	0	1	0	0	0	0	0	1	0	0	0	0
Verrucomicrobium	Verrucomicrobiae	0	1	0	0	2	0	1	0	0	0	0	0	2	0	0	0	0
Mariprofundus	Zetaproteobacteria	0	2	0	1	2	1	0	0	0	1	0	0	2	0	2	0	0
